# Supplementary material
Source: publisher figshare collection journal article supplement (https://asha.figshare.com/articles/dataset/_/28165631)
Supplement: Supplementary file 1 [file 1]

**Supplemental Material S2.** Distribution of diet category by hospital discharge among intubation duration quartiles in days.

| Characteristic | Quartiles of Intubation Duration (Days) |                            |                             |                                |                                | p-value <sup>2</sup> |
|----------------|-----------------------------------------|----------------------------|-----------------------------|--------------------------------|--------------------------------|----------------------|
|                | Overall, N = 94 <sup>1</sup>            | (0,6], N = 27 <sup>1</sup> | (6,10], N = 22 <sup>1</sup> | (10,16.8], N = 22 <sup>1</sup> | (16.8,34], N = 23 <sup>1</sup> |                      |
| diet.cat       |                                         |                            |                             |                                |                                | 0.5                  |
| PO             | 69 (73%)                                | 22 (81%)                   | 15 (68%)                    | 17 (77%)                       | 15 (65%)                       |                      |
| NPO            | 25 (27%)                                | 5 (19%)                    | 7 (32%)                     | 5 (23%)                        | 8 (35%)                        |                      |

<sup>1</sup>n (%)

<sup>2</sup>Fisher's Exact Test for Count Data with simulated p-value  
(based on 2000 replicates)
