# Supplementary material
Source: publisher figshare collection journal article supplement (https://asha.figshare.com/articles/dataset/_/28165631)
Supplement: Supplementary file 2 [file 1]

**Supplemental Material S1.** Modeling the dose-response relationship of intubation duration in days on time until oral diet in log(days).

|                                                   | Model 1           |          | Model 2           |          | Model 3           |          |
|---------------------------------------------------|-------------------|----------|-------------------|----------|-------------------|----------|
|                                                   | Estimate (95% CI) | P-value  | Estimate (95% CI) | P-value  | Estimate (95% CI) | P-value  |
| Intubation Duration in Days                       | 0.08 (0.05-0.11)  | (<0.001) | 0.10 (0.06-0.13)  | (<0.001) |                   |          |
| Intubation Duration in Days Squared               |                   |          | 0 (-0.01-0)       | (0.077)  |                   |          |
| Intubation Duration Quartile 2<br>(7 to 10 days)  |                   |          |                   |          | 0.01 (-0.54-0.56) | (0.973)  |
| Intubation Duration Quartile 3<br>(11 to 17 days) |                   |          |                   |          | 0.95 (0.40-1.49)  | (<0.001) |
| Intubation Duration Quartile 4<br>(18 to 34 days) |                   |          |                   |          | 1.69 (1.07-2.31)  | (<0.001) |
| Model Fit Statistics                              |                   |          |                   |          |                   |          |
| Number of Observations                            | 64                |          | 64                |          | 64                |          |
| R <sup>2</sup>                                    | 0.307             |          | 0.342             |          | 0.410             |          |
| Adjusted R <sup>2</sup>                           | 0.296             |          | 0.320             |          | 0.381             |          |
| AIC                                               | 167.1             |          | 165.8             |          | 160.8             |          |
| BIC                                               | 173.6             |          | 174.4             |          | 171.6             |          |
| Log Likelihood                                    | -80.557           |          | -78.898           |          | -75.395           |          |
| F-statistic                                       | 27.455            |          | 15.848            |          | 13.908            |          |
| RMSE                                              | 0.85              |          | 0.83              |          | 0.79              |          |

Each model shows the estimates, their 95% Confidence Interval (CI), and P-values for all predictors of time until oral diet in log(days) for each model. The intubation duration and its squared version where scaled to have a mean of zero and standard deviation of one. Thus, the estimates should be interpreted as one standard deviation increase equates to a percent increase in time until oral diet equivalent to the estimate. For example, the fourth quartile in Model 3 means that if a patient has a intubation duration of 18 to 34 days, then there is a 169% increase in the time until oral diet in days.
